# Supplementary material
Source: PubMed Central journal article supplement (PMC1838600)
Supplement: pnas_0606356104_3.pdf [file pnas_0606356104_3.pdf]

|                   |                                                             |      |       |       |       |     |
|-------------------|-------------------------------------------------------------|------|-------|-------|-------|-----|
|                   | β8-1                                                        | β9-1 | β10-1 | β11-2 | β12-2 |     |
| <i>LPXD_CHLTR</i> | A V I H P T A I I E D H V C I E P Y A V V C Q H A H V G S A |      |       |       |       | 140 |
| <i>LPXA_ECOLI</i> | . . . . . M I D K S A F V H P T A I V E E G A S I G A N     |      |       |       |       | 23  |
| <i>LPXA_HELPY</i> | . . . . . M S K I A K T A I I S P K A E I N K G             |      |       |       |       | 19  |

|                                                                                 |       |       |       |       |       |       |     |
|---------------------------------------------------------------------------------|-------|-------|-------|-------|-------|-------|-----|
| β13-2                                                                           | β14-3 | β15-3 | β16-3 | β17-4 | β18-4 | β19-4 |     |
| C H I G S G S V I G A Y S T V G E H S Y I H P R V V I R E R V S I G K R V I I Q |       |       |       |       |       |       | 180 |
| A H I G P F C I V G P H V E I G E G T V L K S H V V V N G H T K I G R D N E I Y |       |       |       |       |       |       | 63  |
| V E I G E F C V I G D G V K L D E G V K L H N N V T L Q G H T F V G K N T E I F |       |       |       |       |       |       | 59  |

|                                                                                   |     |     |       |       |     |
|-----------------------------------------------------------------------------------|-----|-----|-------|-------|-----|
| β20-5                                                                             | β21 | β22 | β23-5 | β24-5 |     |
| P G A V I G S C G F G Y V T S A F . G Q H K H L K H L G K V I I E D D V E I G A   |     |     |       |       | 219 |
| Q F A S I G E V N Q D L K . . . . . Y . . . . . A G E P T R V E I G D R N R I R E |     |     |       |       | 94  |
| P F A V L G T Q P Q D L K . . . . . Y . . . . . K G E Y S E L I I G E D N L I R E |     |     |       |       | 90  |

|                                                                                   |       |       |       |       |     |
|-----------------------------------------------------------------------------------|-------|-------|-------|-------|-----|
| β25-6                                                                             | β26-6 | β27-6 | β28-7 | β29-7 |     |
| N T T I D R G R . . F . . K H S V V R E G S K I I D N L V Q I A H Q V E V G Q H S |       |       |       |       | 255 |
| S V T I H R G T V Q . G G L T K V G S D N L L M I N A H I A H D C T V G N R C     |       |       |       |       | 133 |
| F C M I N P G T E G . G I K K T L I G D K N L L M A Y V H V A H D C V I G S H C   |       |       |       |       | 129 |

|                                                                                 |       |       |       |       |       |       |     |
|---------------------------------------------------------------------------------|-------|-------|-------|-------|-------|-------|-----|
| β30-7                                                                           | β31-8 | β32-8 | β33-8 | β34-9 | β35-9 | β36-9 |     |
| M I V A Q A G I A G S T K I G N H V I I G G Q A G I T G H I C I A D H V I M M A |       |       |       |       |       |       | 295 |
| I L A N N A T L A G H V S V D D F A I I G G M T A V H Q F C I I G A H V M V G G |       |       |       |       |       |       | 173 |
| I L A N G V T L A G H I E I G D Y V N I G G L T A I H Q F V R I A K G C M I A G |       |       |       |       |       |       | 169 |

|                                           |        |        |     |     |
|-------------------------------------------|--------|--------|-----|-----|
| β37-10                                    | β38-10 | β39-10 | β40 |     |
| Q T G V T K S I T S P G I Y G G A P A R P |        |        |     | 316 |
| C S G V A Q D V P P Y V I A Q G N H A T P |        |        |     | 194 |
| K S A L G K D V P P Y C T V E G N R A F I |        |        |     | 190 |
