# Supplementary material
Source: PubMed Central journal article supplement (PMC1838600)

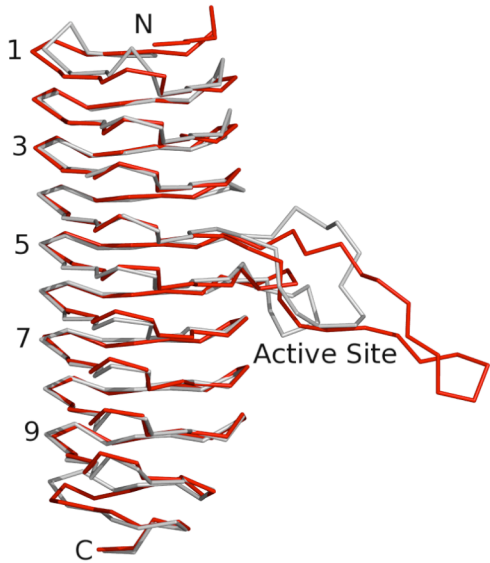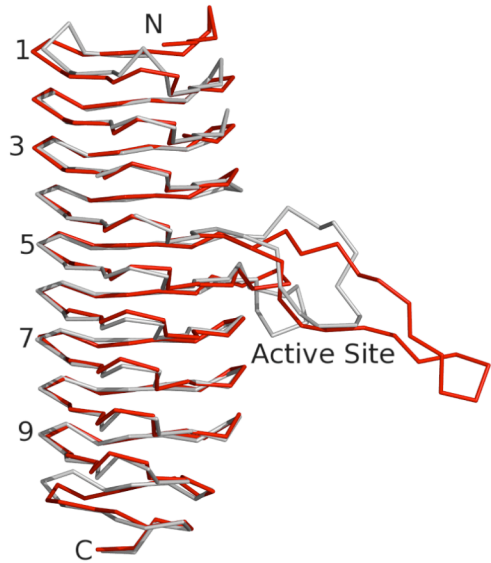

Supplement: pnas_0606356104_1.pdf [file pnas_0606356104_1.pdf]

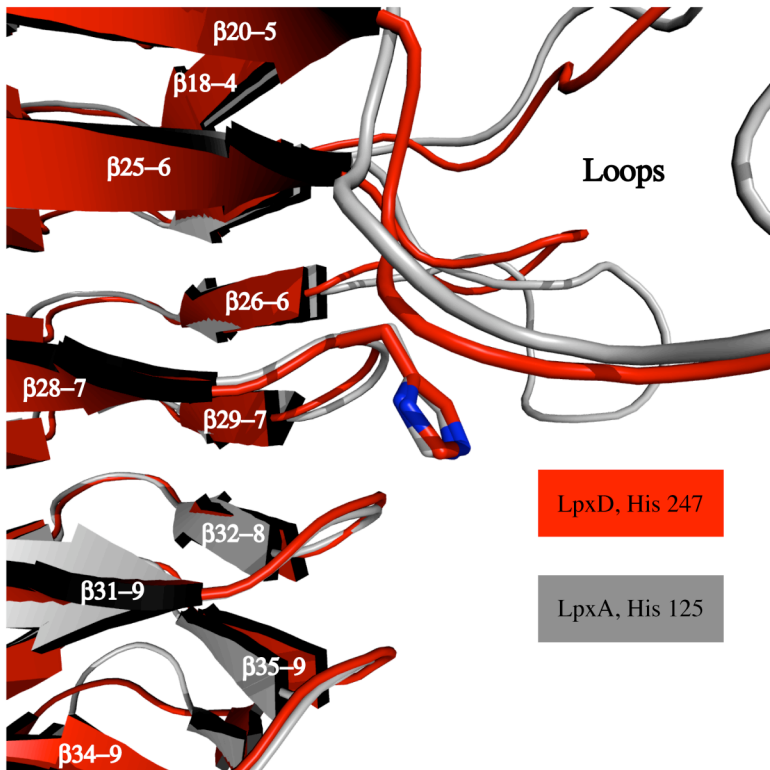

Supplement: pnas_0606356104_2.pdf [file pnas_0606356104_2.pdf]

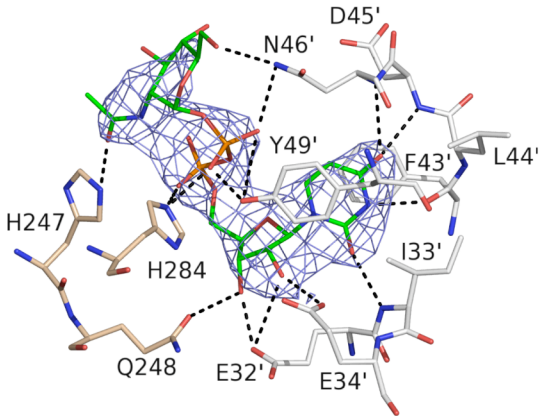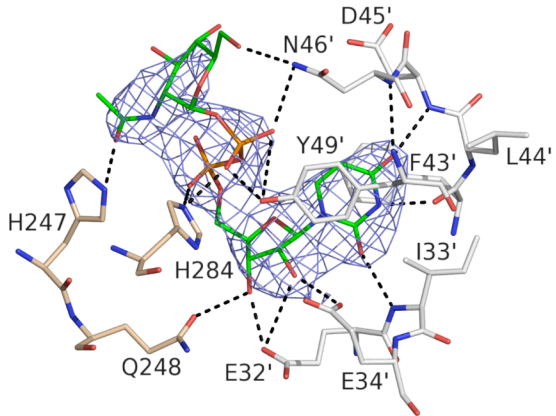

Supplement: pnas_0606356104_4.pdf [file pnas_0606356104_4.pdf]
